# Supplementary material
Source: HighWire-hosted journal article supplement (http://www.cmaj.ca/highwire/filestream/58171/field_highwire_adjunct_files/1/estimate-brisson-online_appendix_2.pdf)
Supplement: estimate-brisson-online_appendix_2.pdf [file estimate-brisson-online_appendix_2.pdf]

**Grade 1 cervical intraepithelial neoplasia**

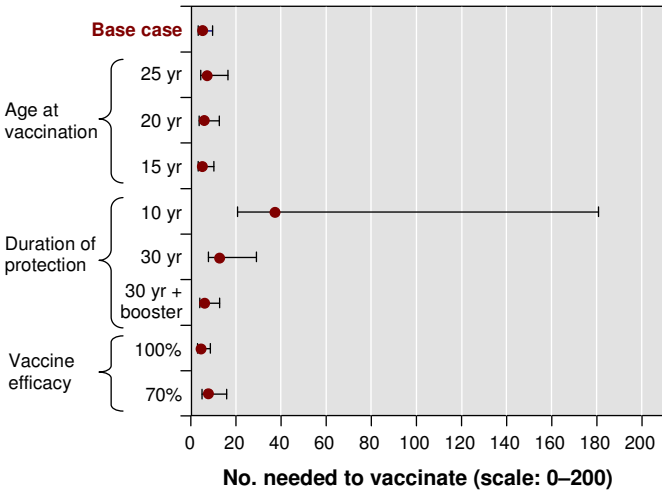

**Grade 2 or 3 cervical intraepithelial neoplasia**

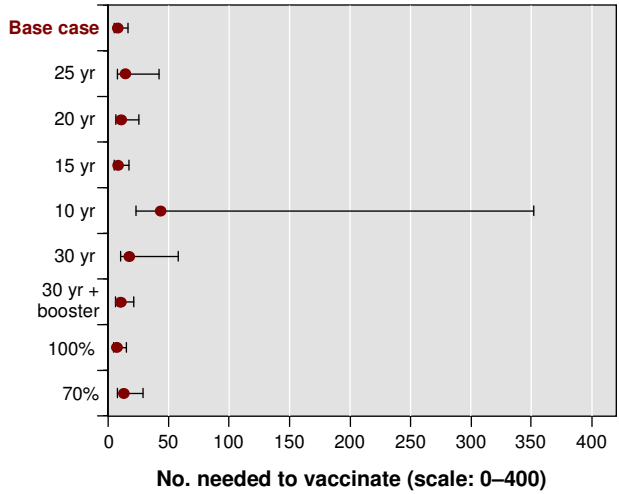

**Death from cervical cancer**

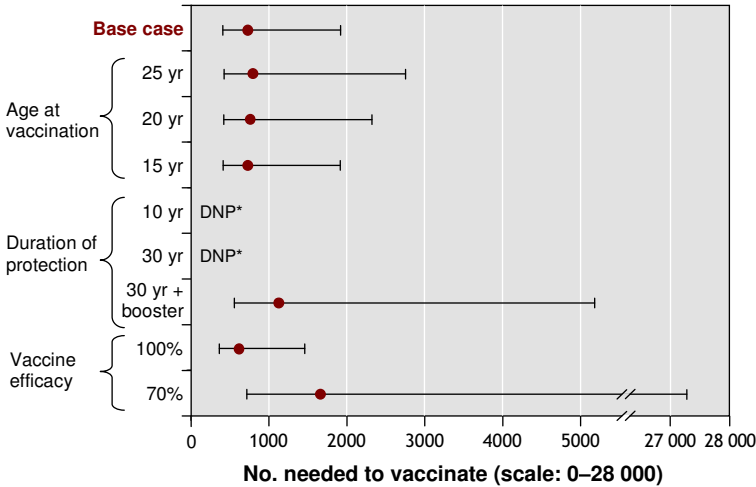

**Life-year lost**

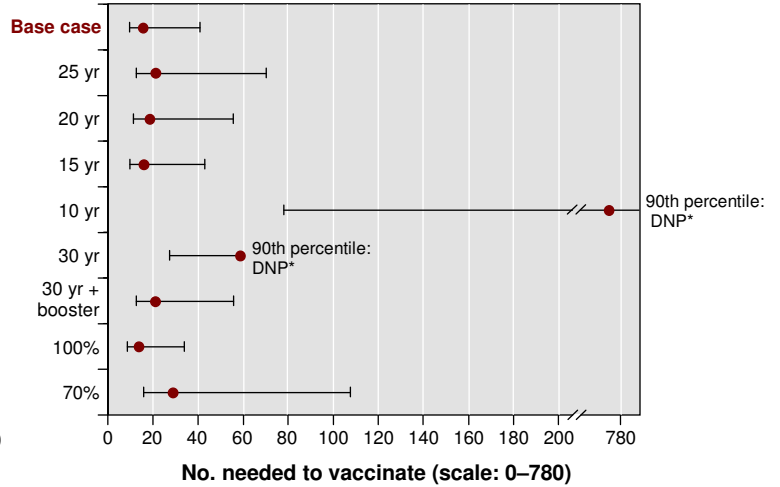

**Appendix 2:** Sensitivity analysis of 209 different parameter sets that reproduced Canadian data specific to human papillomavirus (HPV) type for infection, cervical intraepithelial neoplasia, cervical cancer and genital warts. These graphs plot the numbers needed to vaccinate to prevent 1 case of naturally occurring grade 1 cervical intraepithelial neoplasia, 1 case of naturally occurring grade 2 or 3 cervical intraepithelial neoplasia, 1 death from cervical cancer and 1 life-year lost. For the base case, it is assumed that the vaccine efficacy is 95%, the duration of protection is lifelong and the age at vaccination is 12 years. \*DNP = does not prevent outcome.
